# Supplementary material for: Angiogenesis Driven by the CEBPD–hsa-miR-429–VEGFA Signaling Axis Promotes Urothelial Carcinoma Progression
Source: MDPI journal article supplement (doi:10.3390/cells11040638), 2022-02-11
Supplement: s1 [file s1]

Table S1. VEGFA is a potentially predicted target for hsa-miR-429 by Miranda database (<http://cbio.mskcc.org/miRNA2003/miranda.html>) described as our previous research paper [1].

|             | miRNA targets*                                      |                                                                                                                                                                                                             |
|-------------|-----------------------------------------------------|-------------------------------------------------------------------------------------------------------------------------------------------------------------------------------------------------------------|
|             | Validated targets                                   | Predicted targets                                                                                                                                                                                           |
| hsa-miR-429 | WASF3 XIAP MYC ZEB1 OSTF1 BCL2 ZFPM2 SOX2 RERE ZEB2 | ERMP1 ATP2B1 CYP1B1 SCD MRAS LPAR1 AFF1 TMTC1 CHST11 LFNG SDC2 FBXO32 FBN2 TNFSF9 EGR1 CD70 ZNF281  <b>VEGFA</b>  TREM1 CEBPD TGFB1 EIF5A2 OGFRL1 OMA1 TIMP2 REXO1 HK2 CBX5 KLF4 IFNGR2 ZBTB20 JUN OSMR ID2 |

1. Chan, T.-C.; Chen, Y.-T.; Tan, K.T.; Wu, C.-L.; Wu, W.-J.; Li, W.-M.; Wang, J.-M.; Shiue, Y.-L.; Li, C.-F. Biological significance of MYC and CEBPD coamplification in urothelial carcinoma: Multilayered genomic, transcriptional and posttranscriptional positive feedback loops enhance oncogenic glycolysis. *Clinical and Translational Medicine* **2021**, *11*, e674, doi:10.1002/ctm2.674.
